# Supplementary material
Source: publisher site journal article supplement (https://www.dovepress.com/article/542599)

Figure S1. Flow diagram of patient inclusion and exclusion criteria.


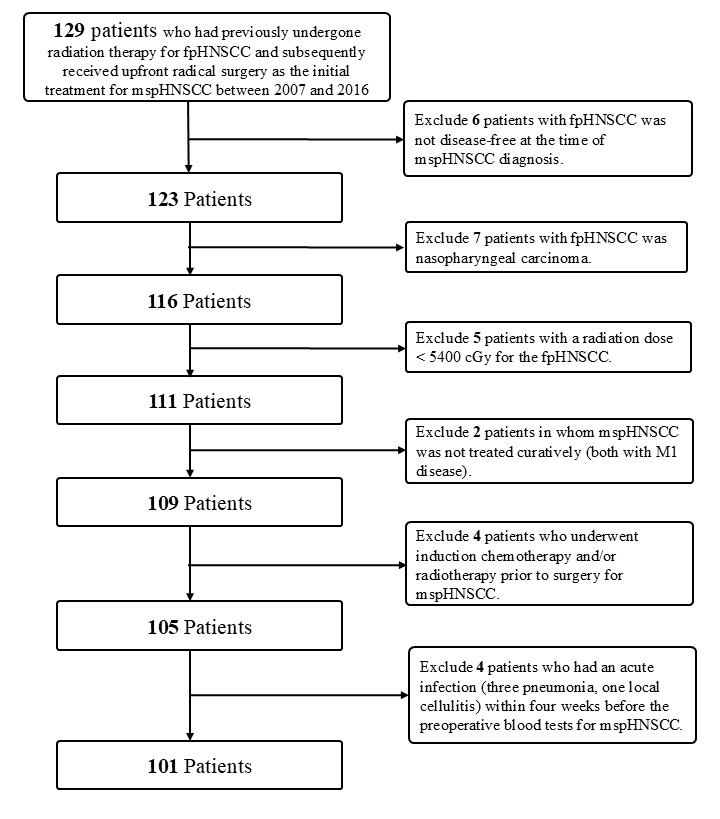

Supplement: Supplementary file 1 [file 542599%20Figure%20S1.docx]
